# Supplementary material for: Unraveling the secrets of harnessing a surfactant-modified strategy in organosolv pretreatment of lignocellulosic biomass for efficient fermentable sugar production
Source: Royal Society of Chemistry journal article supplement (doi:10.1039/d4gc02775b), 2024-01-01
Supplement: d4gc02775b1.pdf [file d4gc02775b1.pdf]

## ***Supporting Information***

### ***Unraveling the secrets of harnessing surfactant-modified strategy in organosolv pretreatment of lignocellulosic biomass for efficient fermentable sugar production***

Guojie Song †<sup>a</sup>, Hui Zhang †<sup>a</sup>, Meysam Madadi<sup>a</sup>, Zhixiangpeng Chen<sup>a</sup>, Hao Wang<sup>a</sup>, Ao Xia<sup>b</sup>,  
Abdolreza Samimi<sup>c</sup>, Chihe Sun<sup>a,\*</sup>, Xianzhi Meng<sup>d</sup>, Arthur J. Ragauskas<sup>d,e</sup>, Fubao Sun<sup>a</sup>

<sup>a</sup> Key Laboratory of Industrial Biotechnology, Ministry of Education, School of Biotechnology, Jiangnan University, Wuxi 214122, China

<sup>b</sup> Key Laboratory of Low-grade Energy Utilization Technologies and Systems, Chongqing University, Ministry of Education, Chongqing 400044, China

<sup>c</sup> Department of Chemical Engineering, University of Sistan and Baluchestan, Zahedan, Iran

<sup>d</sup> Department of Chemical & Biomolecular Engineering, University of Tennessee, Knoxville TN 37996, USA

<sup>e</sup> Joint Institute of Biological Sciences, Biosciences Division, Oak Ridge National Laboratory, Oak Ridge TN 37831, USA

† These authors contributed equally to this work and should be considered co-first authors.

\* Corresponding authors

Chihe Sun: [chihesun@jiangnan.edu.cn](mailto:chihesun@jiangnan.edu.cn)

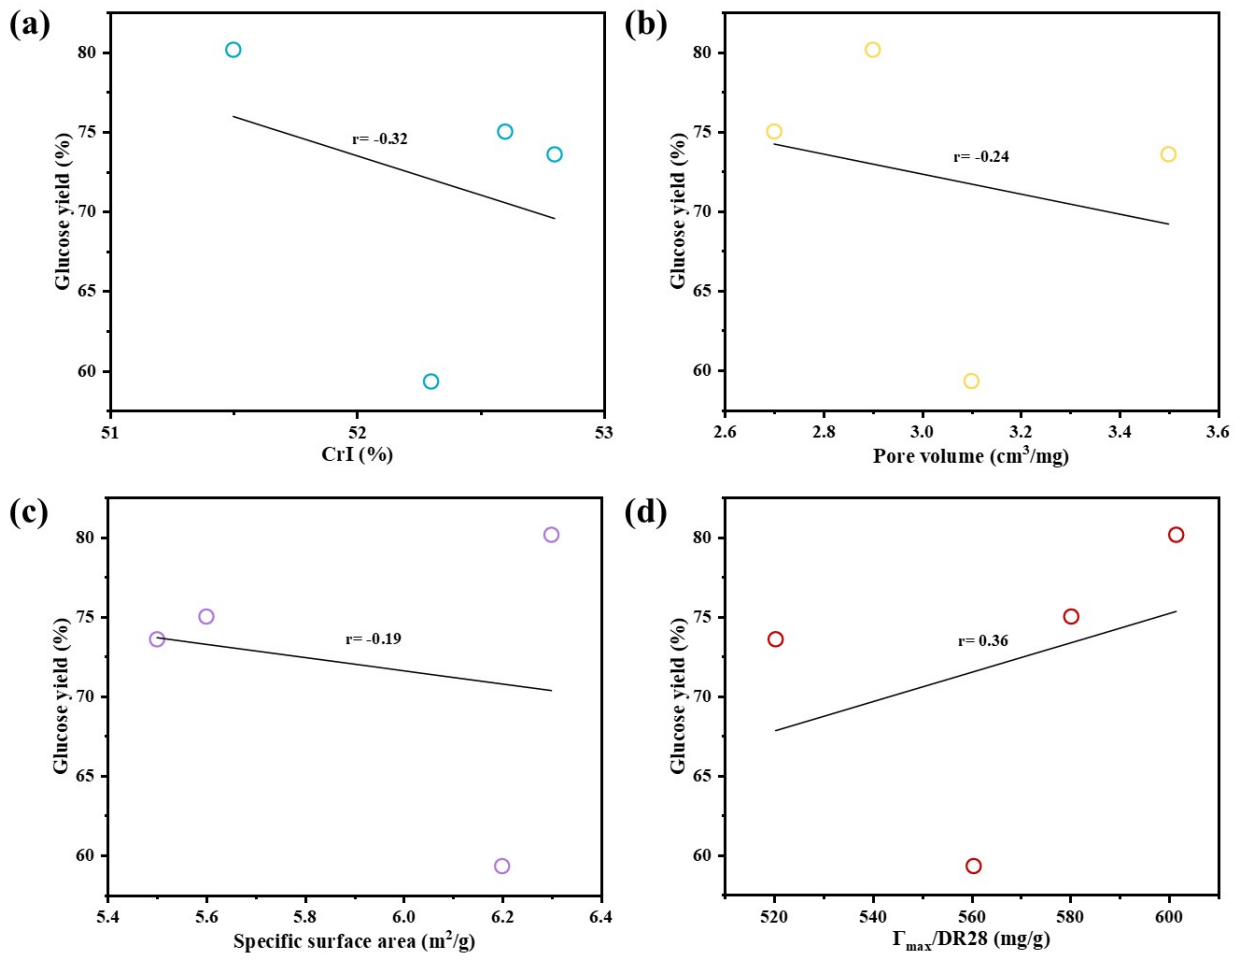

**Fig. S1** Correlation analysis between the substrate-related factors and glucose yield.

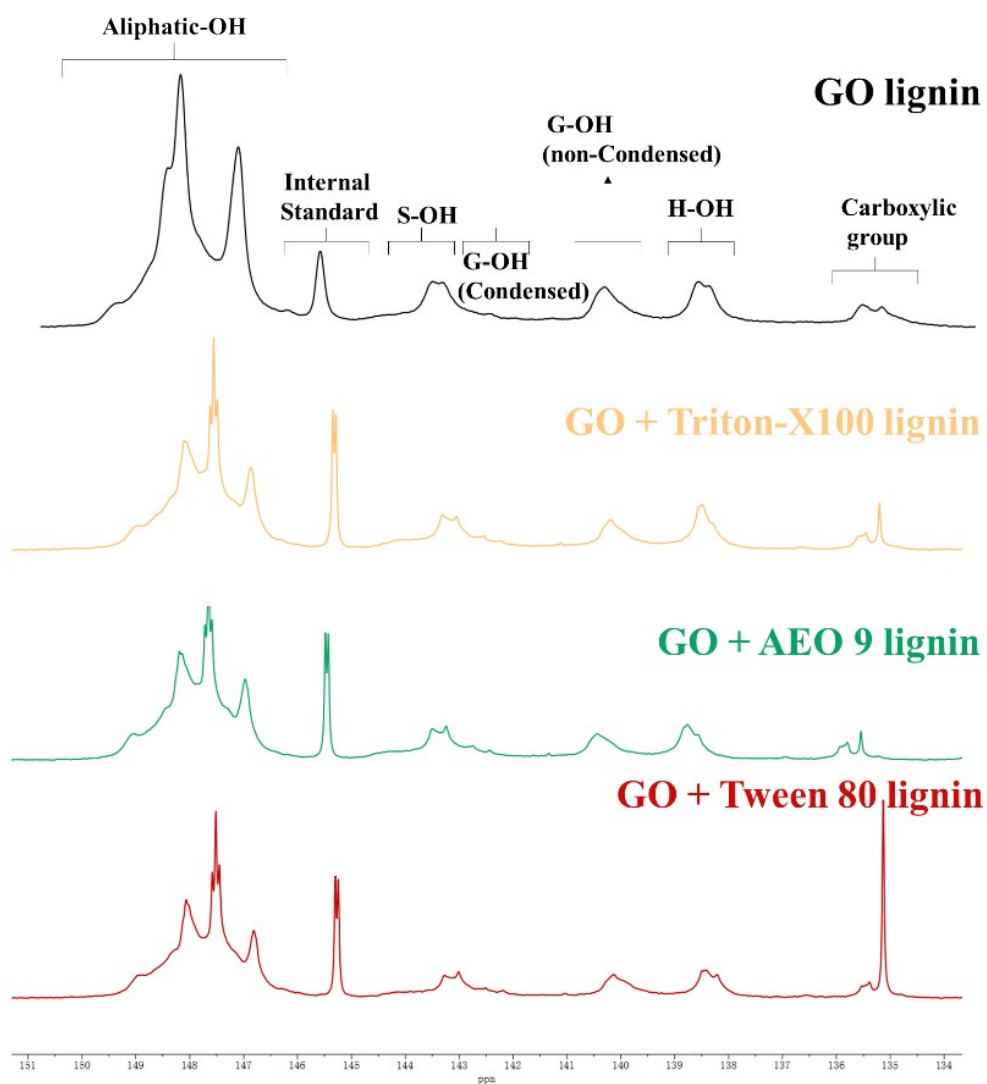

**Fig. S2** Quantification of functional groups (mmol/g) in the residual lignin based on  $^{31}\text{P}$  NMR.

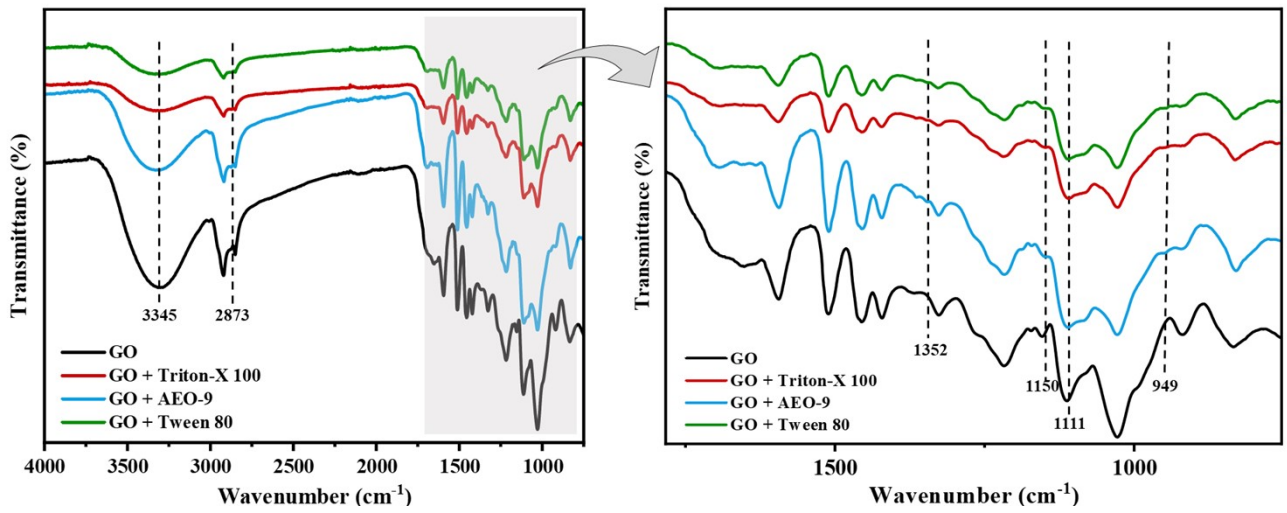

*Fig. S3 FTIR spectra for different lignin samples.*

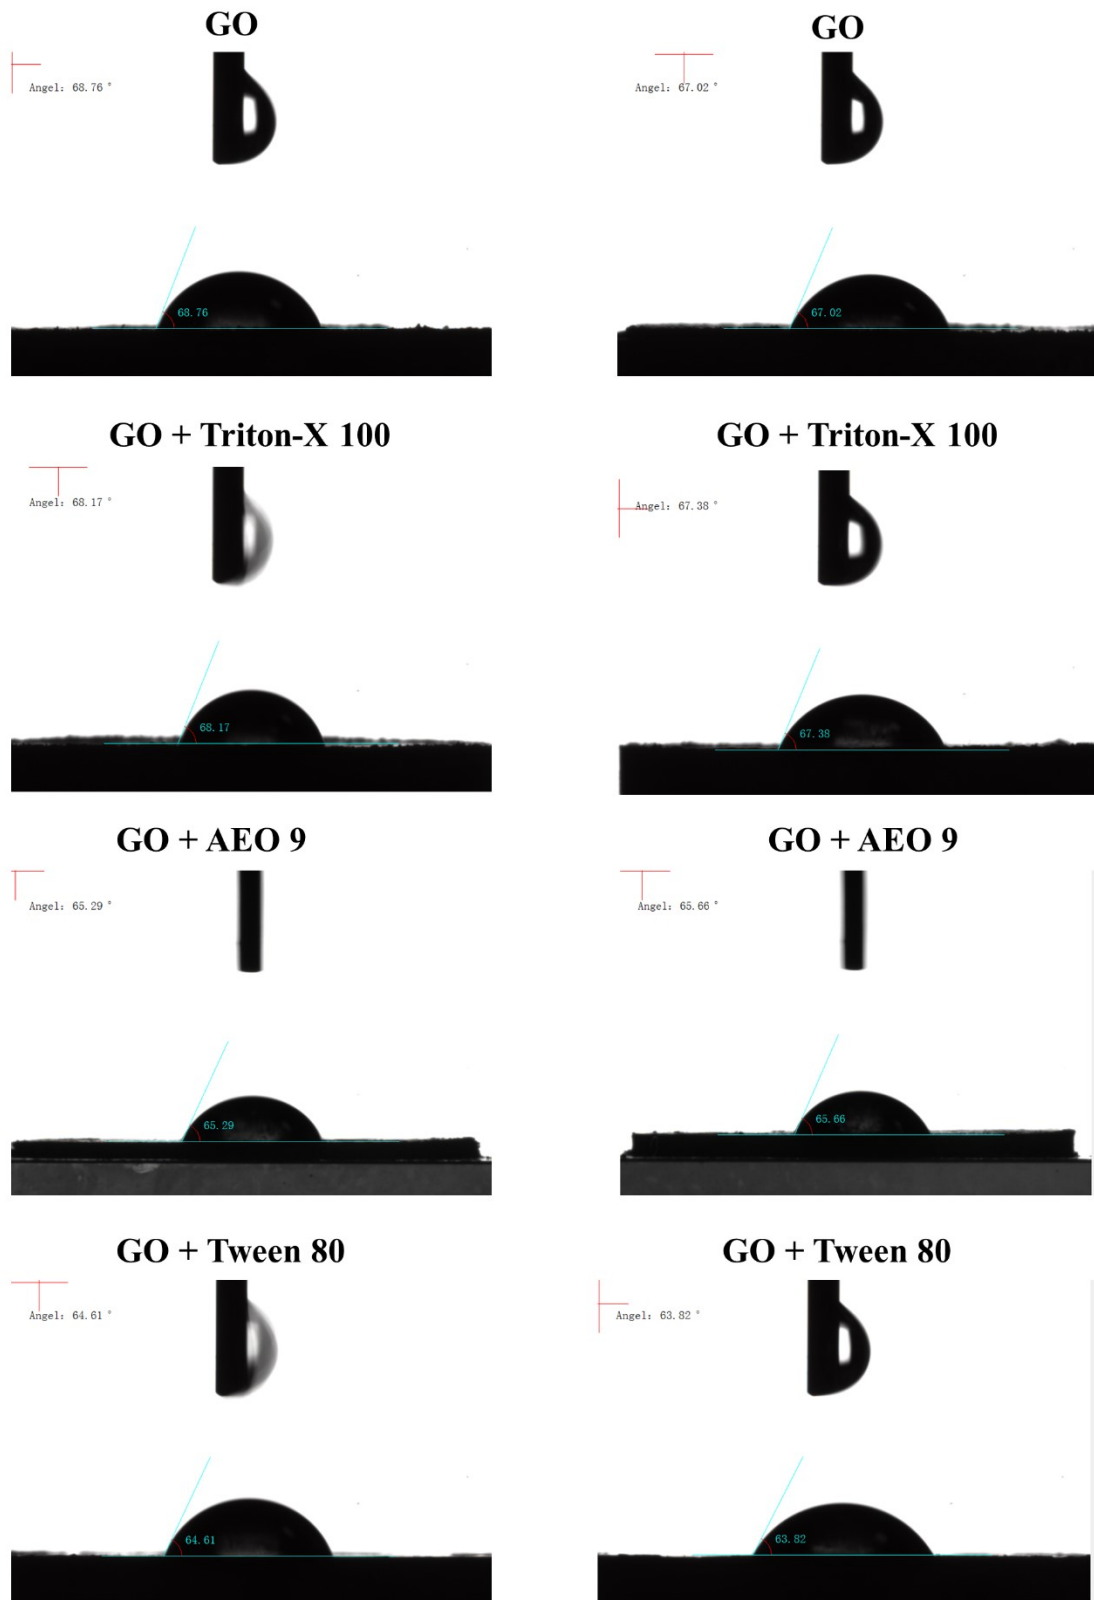

*Fig. S4 The images of contact angle measurement for different residual lignin samples.*

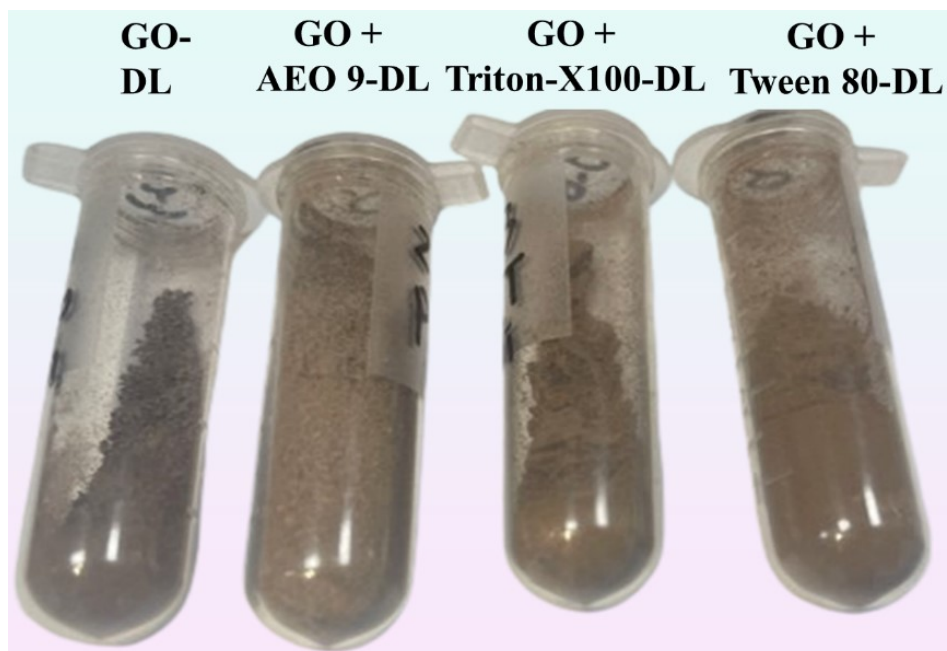

*Fig. S5 Color comparison of different dissolved lignin samples.*
